# Supplementary material
Source: PubMed Central journal article supplement (PMC5860724)

## SUPPLEMENTARY METHODS AND MATERIALS

### METHODS

#### INDEPENDENT EVALUATION

**Whole-exome sequencing data:** To search for independent evidence and to contextualize the impact of each purported CRC gene we made use of recently published whole-exome sequencing (WES) data on 1,006 early-onset familial CRC cases and 1,609 healthy controls<sup>1</sup>. Cases were of European Ancestry recruited to the UK National Study of Colorectal Cancer Genetics (NSCCG)<sup>2</sup>. All cases were diagnosed with CRC aged  $\leq 55$  and had at least one first-degree relative diagnosed with CRC. Controls were individuals with no history of malignancy selected from the 1958 Birth Cohort (1958BC), a longitudinal study following the lives of people born in England, Scotland and Wales during the week of 3-9 March 1958<sup>3</sup>. Full details of WES have been published previously. Briefly, paired end fastq files were aligned to build 37 (hg19) of the human reference genome and alignments were processed using the Genome Analysis Tool Kit (GATKv3) pipeline according to best practices<sup>4</sup>. The Variant Effect Predictor<sup>5</sup> was used to provide annotations on the predicted impact of each variant together with functional classifications and assessment of deleteriousness from the CONDEL<sup>6</sup> algorithm. Samples (cases and controls) with a variant in an established high-penetrance CRC gene which was predicted to be disruptive (stop-gain, frameshift) or previously catalogued as being pathogenic or likely-pathogenic by InSiGHT (The International Society for Gastrointestinal Hereditary Tumours) were removed. Specifically: *APC*: 19 cases, 1 control; *MLH1*: 46 cases; *MSH2*: 46 cases; *MSH6*: 13 cases, 1 control; *MUTYH*: 9 cases; *PMS2*: 6 cases, 2 controls; *POLD1*: 1 case, 1 control; *POLE*: 3 cases; *BMPR1A*, *SMAD4*, *STK11*: 0 cases. Thus for the analysis presented in this manuscript we made use of whole-exome sequencing data on 863 cases and 1,604 controls.

**Gene Burden Analysis:** With currently attainable sample sizes, a studies power to detect a statistically significant association with any rare variant is typically weak. Here we use WES data described above, to look for an enrichment of variation in cases versus controls, for each postulated CRC gene as a whole. As the power of such comparison depends critically on the ability to distinguish between pathogenic and non-pathogenic variation, we defined and compared a number of variant classes: (1) Disruptive mutations (stop-gain, frameshift); (2) Disruptive and predicted damaging mutations (stop-gain, frameshift, missense predicted to be damaging by CONDEL, splice site acceptor/donors); (3) All coding non-synonymous variants. We assessed rare (minor allele frequency [MAF] <1%) and very rare (MAF<0.1%) mutations in each variant class. Comparisons were made using (a) all 863 cases (b) 159 cases with Amsterdam-II positive family histories (Amsterdam-I n=146). Thus in total we performed 12 comparisons for each gene.

**Further analysis of the recurrent *FANCM* p.Arg1931Ter (rs144567652) variant:** We studied the association of the recurrent variant *FANCM* p.Arg1931Ter (rs144567652) with CRC by analyzing published Illumina Infinium Human Exome BeadChip 12v1.0 or 12v1.1 exon array data<sup>7</sup>. Specifically, we made use of UK case/control data (excluding samples also included in our WES data) comprising: (i) 3,537 English CRC cases and 4,811 control patients; (ii) 2,015 Scottish CRC cases and 1,981 Scottish controls.

## EVIDENCE FRAMEWORK

To assess the validity of purported CRC genes, accounting for varying study design, we collated the following evidence where appropriate (Supplementary Table 1):

- (1) Where gene/variants were identified through the analysis of multiple members of a single family we evaluated the strength of segregation data – co-inheritance of the mutation with affection status (CRC or polyps) in the family. If not formally quantified in the published report we calculated non-parametric linkage (NPL) statistic *P*-values<sup>8</sup> using the family information provided.
- (2) Where a specific CRC risk variant was reported: we looked for reported evidence of a statistically significant enrichment in CRC cases versus controls. In conjunction with

our WES data we examined frequency data on the mutation in an ethnically appropriate subset of the Exome-Aggregation-Consortium (ExAC) database<sup>9</sup>; a catalog of exome sequencing data for 60,706 individuals of diverse ancestries (non-Finnish European (NFE) 33,370 exomes, East Asian (EAS) 4,327 exomes, Finnish (FIN) 3,307 exomes).

- (3) Where numerous variants are identified in a specific gene: we looked for evidence of gene burden testing in cases versus controls, and if performed, evidence of statistically significant enrichment of mutation in cases.
- (4) Where recessive inheritance was suspected or indicated: homozygosity or compound-heterozygosity for pathogenic mutations in the proposed CRC gene was assessed in cases and controls.
- (5) Computational data on the presumptive effect of the variant.
- (6) Functional data – demonstration that mutation has a functional effect and the relevance to CRC biology.
- (7) Other information – evidence of a highly-specific phenotype associated with CRC, evidence of somatic mutation of the wild-type allele in cancers from carriers consistent with tumor suppressor gene function.

## **REVIEW OF EXISTING LITERATURE FOR EACH GENE ASSESSED**

### ***NTHL1***

Evidence for variation in *NTHL1* as a cause of recessive CRC has been provided by three unrelated Dutch families homozygous for the rare (ExAC NFE MAF=0.0023, homozygosity ~1/75,000) inactivating p.Gln90Ter mutation<sup>10</sup>. Multiple colorectal adenomas with or without CRC were diagnosed in all seven homozygotes. The tumor mutation spectrum was significantly enriched for C:G>T:A transitions, consistent with the mutation spectra observed in *NTHL1* double-knockout mice. Subsequent to this report, compound heterozygosity for inactivating *NTHL1* p.Gln90Ter/c.709+1G>A mutations was identified in a 41-year old Canadian woman diagnosed with polyposis, CRC and multiple tumors<sup>11</sup>. Tumors were again enriched for somatic C:G>T:A transitions.

**Evidence Summary:** Multiple reports associating homozygosity and compound-heterozygosity with CRC. Evidence of functional effect in CRC.

### ***RPS20***

In seven affected members (average age 52, range 24-75) of a four-generation Finnish Amsterdam-positive FCCTX family, Nieminen *et al.* identified a heterozygous 1-bp duplication, resulting in a frameshift and premature termination (p.Val50SerfsTer23), in *RPS20*<sup>12</sup>. The mutation, identified through genetic linkage analysis and WES, showed full cosegregation with microsatellite-stable early-onset CRC thus providing statistically significant evidence (reported LOD score=3.0; calculated NPL=5.35,  $P=0.0078$ ) for germline mutation in *RPS20* as a cause of CRC. The mutation was absent in 292 population controls and is not reported in the ExAC database, which includes 3,307 Finnish individuals. Tumors from mutation carriers did not show loss of the wildtype allele (LOH<sup>WT</sup>). Lymphoblastoid cells (LCLs) from cases carrying p.Val50SerfsTer23 mutation showed a marked increase in 21S pre-rRNAs compared to controls ( $P$ -value not calculated), consistent with a late pre-rRNA processing defect and suggestive of *RPS20* haploinsufficiency. Germline *RPS20* mutations were not found in 25 additional Finnish FCCTX families, 292 population controls or in tumor DNA from 50 primary CRC and 11 CRC cell lines.

**Evidence Summary:** Statistically significant evidence of segregation, absence of gene mutation in controls. Functional evidence in non-colon tissue. No evidence of somatic mutation or functional effect in CRC.

### ***FANCM***

By searching within tumorigenesis genes for rare/novel truncating mutations, which also showed LOH<sup>WT</sup> within the tumor, Smith *et al.* identified the *FANCM* mutation p.Arg1931Ter (rs144567652) in one of 50 sporadic UK CRC cases<sup>13</sup>. As *FANCM* is functionally linked to *MSH2/MSH6* they sought further evidence for the role of this variant by genotyping an additional case-control series identifying the mutation in 1 of 2,207 CRC cases and 1 of 2,176 controls. The tumor of the additional case again showed LOH<sup>WT</sup>. Combining discovery and replication samples showed no significant enrichment of the mutation in CRC (cases

2/2,257, controls 1/2,176,  $P=0.57$ ). Smith *et al.* presented no segregation or functional data. However, a subsequent report by Peterlongo *et al.* proposing p.Arg1931Ter as a familial breast cancer risk factor showed that p.Arg1931Ter induces exon skipping resulting in decreased DNA repair activity in mouse embryonic fibroblast cells<sup>14</sup>.

**Evidence Summary:** Loss of wild-type allele in tumors. Functional evidence in non-colon tissue. No evidence of segregation or functional effect in CRC. No significant enrichment of the mutation in CRC.

### **FAN1**

Through WES of three individuals from a Spanish MMR-proficient, Amsterdam-positive CRC family Sequi *et al.* identified a novel *FAN1* truncating mutation p.Cys47Ter<sup>15</sup>. Evidence of segregation with CRC was limited (calculated NPL=0.95,  $P=0.25$ ). Tumors developed by p.Cys47Ter mutation carrier showed no reduction in the expression of wild-type RNA or *FAN1* protein. Screening an additional 247 Spanish Amsterdam/Bethesda positive cases for rare (MAF<0.01; dbSNP135) variants identified an additional truncating mutation (p.Arg952Ter) and three missense mutations (p.Asp140Thr and p.Arg591Trp - predicted to be damaging by SIFT and CONDEL algorithms; p.Pro340Ser - predicted to be benign). No *FAN1* mutations were identified in 250 population individuals without CRC. Whilst suggestive of an enrichment in cases for the overall burden of variation in *FAN1*, the size of the control population is insufficient to provide statistically robust support (combined 5/248 cases, 0/250 controls,  $P=0.061$ ). Using all five families the calculated NPL segregation score was non-significant (NPL=1.05,  $P=0.125$ , Supplementary Table 1). There was no evidence of *FAN1* LOH or somatic mutation in tumors from any of the five *FAN1* mutation carriers. LCLs derived from p.Cys47Ter and p.Asp140Thr carriers showed greater sensitivity to high doses of mitomycin C (MMC) compared to cells from a wild-type individual (p.Cys47Ter:  $P=0.01$  Wilcoxon rank sum test; p.Asp140Thr:  $P$ -value not calculated). Transfection of a *FAN1* knockout human embryonic kidney cell line with p.Asp140Thr failed to reverse its MMC sensitivity.

**Evidence Summary:** Limited evidence of segregation and an increase in mutational burden in cases. Functional evidence for 2/4 mutations in non-colon tissue. No evidence of somatic mutation, LOH or functional effect in CRC.

### **TP53**

Yurgelun *et al.* examined the frequency of rare germline *TP53* missense mutations in 457 patients with early-onset CRC (median age 36, range 15-40) and without a known hereditary cancer syndrome<sup>16</sup>. In six of the patients (1.3%), they identified missense changes in *TP53*. No comparison was made to the burden of *TP53* mutations in controls.

Based on this data they concluded that the frequency of *TP53* mutations is comparable with the proportion of inherited CRC thought to be attributable to germline *APC* mutations. This is a false comparison:

- (1) *TP53* missense variants are assumed to be deleterious. However, of the six variants they identified only one was predicted to be damaging by both SIFT and PolyPhen-2, with three being predicted benign by both algorithms. There was no other evidence that mutations had deleterious functional effect.
- (2) The proportion of inherited CRC thought to be attributable to germline *APC* mutations (1%) is not the same as the frequency of samples with *APC* missense changes (in our original 1,006 cases, not screened for mutations in known genes, 94 [9.3%] had rare [MAF<1%] missense changes in *APC*).

**Evidence Summary:** No comparison was made to mutational burden in controls. No evidence (even *in silico*) mutations have functional effect. No evidence of segregation or somatic mutation in CRC.

### **BUB1 and BUB3**

**BUB1:** Disruptive mutations (p.Gln16Ter, p.Gln949Argfs) were identified in two of 23 Chinese early-onset (age at diagnosis  $\leq 45$ ) CRC cases; both variants were absent from 700 population controls but no comparison was made with the burden of mutations in controls<sup>17</sup>. No evidence of segregation was demonstrated and notably one of the mutation

carriers harbored a *MLH1* mutation (InSiGHT Class4: likely pathogenic), which unlike the *BUB1* variant was also carried by a sibling with polyps. The functional effect of mutations, LOH or somatic mutation within tumors was not assessed. No *BUB1* mutations were identified among 184 Netherlands/German cases.

**Evidence Summary:** Absence of identified mutations in controls, but no comparison made to mutational burden in controls. No functional evidence. No evidence of segregation or somatic mutation in CRC.

**BUB3:** WES identified a novel damaging (as predicted by PolyPhen-2 SIFT, HOPE) missense mutation (p.Phe264Leu) in one of 10 Dutch early-onset (age at diagnosis  $\leq 45$ ) CRC cases (0/23 Chinese cases)<sup>17</sup>. Sequencing *BUB3* in 174 Netherlands/German CRC cases identified two further missense variants (p.Lys21Asn, p.Arg149Gln) that were predicted (by at least one algorithm) to be damaging, although PolyPhen-2 and SIFT predicted p.Arg149Gln to be benign. All three variants were absent in 1,154 controls but no comparison was made with burden of mutations in controls. No evidence of segregation, LOH or somatic mutation. Lymphocytes and primary skin fibroblasts from p.Phe264Leu and p.Lys21Asn mutation carriers showed significant enrichment of aneuploidy and structural abnormalities versus controls (p.Arg149Gln was not assessed/presented).

**Evidence Summary:** Absence of identified mutations in controls, but no comparison made to mutational burden in controls. Functional evidence in non-colon tissue. No evidence of somatic mutation, LOH or functional effect in CRC.

### ***LRP6* and *PTPN12***

Using WES de Voer *et al.* looked for genes recurrently affected by damaging missense mutations, assessed using a single prediction algorithm PhyloP, in 55 Dutch non-polyposis MMR-proficient early-onset (age at diagnosis  $\leq 45$ ) CRC cases<sup>18</sup>:

***LRP6:*** Damaging *LRP6* missense mutations (p.Trp239Leu, p.Asn789Ser, p.Thr867Ala) were identified in three cases. All three variants were within  $\beta$ -propeller domains. In mutation

carriers LRP6 protein showed no difference in protein expression or subcellular localization compared to wild-type. In Chinese Hamster Ovary cells p.Asn789Ser and p.Thr867Ala induced significant increases in WNT signaling activity ( $P < 0.001$ ). Analysis of 174 additional Netherlands/German CRC and 2,329 population controls identified no additional damaging missense mutations in cases, with 18 identified in controls including p.Thr867Ala in three controls. By using only the 55 original cases and the 2,329 controls, de Voer *et al.* reported significant increase in mutation burden in cases versus controls (cases 3/55, controls 18/2,329,  $P = 0.01$ ). However using all cases there was no significant enrichment of LRP6 mutation in cases versus controls (cases 3/229, controls 18/2,329,  $P = 0.43$ ).

**Evidence Summary:** No increase in mutational burden in cases. Functional evidence in non-colon tissue. No evidence of somatic mutation, LOH or functional effect in CRC.

**PTPN12:** WES identified two damaging missense mutations (p.Arg522Met, p.Ser684Leu) in three of the 55 cases. Analysis of 174 additional Netherlands/German CRC and 2,329 population controls identified a new variant (p.Ala105Val) in one case and 11 variants in controls including previously identified p.Arg522Met in two controls and p.Ser684Leu in three controls. The burden of mutation in cases was significantly enriched versus controls (cases 4/229, controls 11/2329,  $P = 0.039$ ) albeit non-significant after adjustment for multiple testing (three candidate genes,  $P = 0.12$ ).

**Evidence Summary:** Limited evidence of an increase in mutational burden in cases. Variants not absent from controls. No evidence of somatic mutation, LOH or functional effect in CRC.



## SUPPLEMENTARY FIGURES AND TABLES

**Supplementary Figure 1: Forest plot of allelic odds ratio associated with *FANCM* p.Arg1931Ter (rs144567652) genotype and CRC.** Studies [SMITH: original publication (2,207 cases, 2,176 controls)<sup>13</sup>; WES: whole-exome sequencing analyzed in this manuscript (863 cases, 1,604 controls); ENG: English Illumina Exome-BeadChip replication series (3,537 cases, 4,811 controls); SCOT: Scottish Illumina Exome-BeadChip replication series (2,015 cases, 1,981 controls)] were weighted according to the inverse of the variance of the log of the odds ratio (OR) calculated by unconditional logistic regression. Meta-analysis under a fixed-effects model was conducted using standard methods. Cochran's *Q* statistic to test for heterogeneity and the *I*<sup>2</sup> statistic to quantify the proportion of the total variation due to heterogeneity were calculated. Horizontal lines indicate 95% confidence intervals (CIs). Boxes indicate OR point estimate; its area is proportional to the weight of the study. Diamond (and broken line) indicates overall summary estimate, with CI given by its width. Unbroken vertical line indicates null value (OR=1.0).

**Supplementary Table 1: Evidence for genes and variants being associated with CRC risk.**

Analysis of the evidence presented in publications linking *NTHL1*, *RPS20*, *FANCM*, *FAN1*, *TP53*, *BUB1*, *BUB3*, *LRP6* and *PTPN12* with the risk of developing CRC

**Abbreviations:** AOD: Age of CRC diagnosis; EAS: East Asian; FCCTX: Familial CRC Cancer Type X; FS: frameshift; Het: heterozygous; Hom: homozygous; LOH: loss of heterozygosity; MMC: Mitomycin C; MS: missense; MSS: lack of mismatch repair deficiency (MMR) tested through either microsatellite stability or no loss of MMR proteins; NFE: Non-Finnish European; NPL: non-parametric linkage; NT: Not tested; SG: stop-gain; TS: target sequencing; WES: whole exome sequencing; WT: wild-type

**Supplementary Table 2: Gene Burden analysis.** Number of WES cases (n=863) and controls (n=1,604) with rare mutations in genes suggested to increase CRC risk. We considered three sets of variants: Class-1, disruptive mutations -stop-gain, frameshift; Class-2, predicted damaging -disruptive plus missense predicted to be damaging by CONDEL and splice site acceptor/donors; Class-3, all coding non-synonymous variants. Tables show -A all cases - n=863 and controls -n=1,604 with very rare -MAF<0.1% mutations; -B Amsterdam-II positive cases -n=159 and controls with rare -MAF<1% mutations; -C Amsterdam-II positive cases and controls with very rare -MAF<0.1% mutations. For each gene and variant class, numbers of cases and controls were compared and *P*-values calculated using Fishers exact test.

**Supplementary Table 3: *BUB1*, *BUB3*, *FAN1*, *FANCM*, *LRP6*, *PTPN12*, *RPS20* and *TP53* variants -MAF<1% identified in 863 CRC cases and 1,604 controls. -See excel file**

ACCEPTED MANUSCRIPT

## REFERENCES

1. **Chubb D, Broderick P, Dobbins SE**, et al. Nat Commun 2016;7:11883.
2. Penegar S, et al. Br J Cancer 2007;97:1305-9.
3. Power C, et al. Int J Epidemiol 2006;35:34-41.
4. McKenna A, et al. Genome Res 2010;20:1297-303.
5. McLaren W, et al. Bioinformatics 2010;26:2069-70.
6. Gonzalez-Perez A et al. Am J Hum Genet 2011;88:440-9.
7. **Timofeeva MN, Kinnersley B**, et al. Sci Rep 2015;5:16286.
8. Kruglyak L et al. Am J Hum Genet 1996;58:1347-63.
9. Lek M, et al. Nature 2016;536:285-91.
10. Weren RD, et al. Nat Genet 2015;47:668-71.
11. Rivera B, et al. N Engl J Med 2015;373:1985-6.
12. Nieminen TT, et al. Gastroenterology 2014;147:595-598 e5.
13. Smith CG, et al. Hum Mutat 2013;34:1026-34.
14. Peterlongo P et al. Hum Mol Genet 2015;24:5345-55.
15. **Segui N, Mina LB**, et al. Gastroenterology 2015;149:563-6.
16. Yurgelun MB et al. JAMA Oncol 2015;1:214-21.
17. **de Voer RM, Geurts van Kessel A, Weren RD, Ligtenberg MJ**, et al. Gastroenterology 2013;145:544-7.
18. **de Voer RM, Hahn MM**, et al. PLoS Genet 2016;12:e1005880

---

Author names in bold designate shared co-first authorship

**Supplementary Table 1: Evidence for genes and variants being associated with CRC risk.** Analysis of the evidence presented in publications linking *NTHL1*, *RPS20*, *FANCM*, *FAN1*, *TP53*, *BUB1*, *BUB3*, *LRP6* and *PTPN12* with the risk of developing CRC

**Abbreviations:** AOD: Age of CRC diagnosis; EAS: East Asian; FCCTX: Familial CRC Cancer Type X; FS: frameshift; Het: heterozygous; Hom: homozygous; LOH: loss of heterozygosity; MMC: Mitomycin C; MS: missense; MSS: lack of mismatch repair deficiency (MMR) tested through either microsatellite stability or no loss of MMR proteins; NFE: Non-Finnish European; NPL: non-parametric linkage; NT: Not tested; SG: stop-gain; TS: target sequencing; WES: whole exome sequencing; WT: wild-type

| Gene         | CRC Gene Burden                                                      | Control Gene Burden | Gene Functional Data                                                                                                                                                                                     | Chr | Position (GRCh37) | c.DNA Change | Protein Change  | Class | dbSNP       | Segregation                               | Variant Case Frequency | Variant Control Frequency | ExAC Allele Frequency | Other Information                                                 |
|--------------|----------------------------------------------------------------------|---------------------|----------------------------------------------------------------------------------------------------------------------------------------------------------------------------------------------------------|-----|-------------------|--------------|-----------------|-------|-------------|-------------------------------------------|------------------------|---------------------------|-----------------------|-------------------------------------------------------------------|
| <i>NTHL1</i> | WES Hom 3/51 APC-MUTYH mutation-negative polyposis patients          | 17 Het/2329         |                                                                                                                                                                                                          | 16  | 2096239           | c.268C>T     | p.Gln90Ter      | SG    | rs150766139 | Family1:2/2<br>Family2:3/3<br>Family3:2/2 |                        | 17 Het/2329               | NFE: 0.0023           | Tumors significantly enriched for C:G>T:A transitions             |
| <i>RPS20</i> | WES 4 individuals Finnish FCCTX family; TS 0/25 Finnish FCCTX        | NT                  | RPS20 depletion in HeLa cells and LCLs from patients carrying c.147dupA showed increase in 21S pre-rRNA vs controls                                                                                      | 8   | 56986283          | c.147dupA    | Val50SerfsTer23 | FS    |             | NPL=5.35,<br>P=0.0078                     | 1/26 FCCTX Family      | 0/584                     | Absent                | No LOH (0/2)                                                      |
| <i>FANCM</i> | WES 1/50                                                             | NT                  |                                                                                                                                                                                                          | 14  | 45667921          | c.5791C>T    | p.Arg1931Ter    | SG    | rs144567652 | NT                                        | 2/2,258                | 1/2176                    | NFE: 0.0009           | LOH WT 2/2                                                        |
| <i>FAN1</i>  | WES 3 individuals Spanish FCCTX family. TS 4/247 Spanish FCCTX cases | 0/250               | LCL from p.C47Ter and p.Asp140Tyr carriers showed greater sensitivity to high doses of MMC. Transfection of HEK293T (Human Embryonic Kidney) FAN1 with p.Asp140Tyr failed to reverse its MMC sensitivity | 15  | 31197007          | c.141C>A     | p.Cys47Ter      | SG    | rs144469584 | NPL=0.94,<br>P=0.25                       | 1/248 FCXX Family      | 0/538                     | Absent                | No LOH/somatic mutation. No reduction in FAN1 RNA or protein.     |
|              |                                                                      |                     |                                                                                                                                                                                                          | 15  | 31197284          | c.418G>T     | p.Asp140Tyr     | MS    | rs761776412 | P/C, NPL=0,<br>P=1                        | 1/248 FCXX Family      | 0/250                     | NFE: 1.50E-5          | Predicted to be damaging by SIFT/CONDEL. No LOH/somatic mutation. |
|              |                                                                      |                     |                                                                                                                                                                                                          | 15  | 31197884          | c.1018C>T    | p.Pro340Ser     | MS    | rs771206220 | NPL=1.05,<br>P=0.125                      | 1/248 FCXX Family      | 0/250                     | NFE: 1.50E-5          | Predicted to be benign by SIFT/CONDEL                             |

| Gene                    | CRC Gene Burden                                                                                                                      | Control Gene Burden | Gene Functional Data                                                                                         | Chr | Position (GRCh37) | c.DNA Change | Protein Change | Class | dbSNP           | Segregation         | Variant Case Frequency                | Variant Control Frequency | ExAC Allele Frequency | Other Information                                                                      |
|-------------------------|--------------------------------------------------------------------------------------------------------------------------------------|---------------------|--------------------------------------------------------------------------------------------------------------|-----|-------------------|--------------|----------------|-------|-----------------|---------------------|---------------------------------------|---------------------------|-----------------------|----------------------------------------------------------------------------------------|
| <i>FAN1</i><br>(cont'd) |                                                                                                                                      |                     |                                                                                                              | 15  | 31206254          | c.1771C>T    | p.Arg591Trp    | MS    | rs3774<br>18523 | NT                  | 1/248 FCXX<br>Family                  | 0/250                     | NFE: 1.50E-5          | Predicted to be<br>damaging by<br>PolyPhen-<br>2/SIFT/CONDEL                           |
|                         |                                                                                                                                      |                     |                                                                                                              | 15  | 31222812          | c.2854C>T    | p.Arg952Ter    | SG    | rs1847<br>45027 | NPL=0.70,<br>P=0.25 | 1/248 FCXX<br>Family                  | 0/250                     | NFE: 9.02E-5          |                                                                                        |
| <i>TP53</i>             | TS 6/457 North-<br>American,<br>Australian, New<br>Zealand non-<br>polyposis,<br>AOD≤40                                              | NT                  |                                                                                                              | 17  | 7572973           | c.1136G>A    | p.Arg379His    | MS    |                 | NT                  | 1/457                                 | NT                        | Absent                | Predicted to be<br>benign by PolyPhen-<br>2/SIFT                                       |
|                         |                                                                                                                                      |                     |                                                                                                              | 17  | 7577069           | c.869G>A     | p.Arg290His    | MS    | rs5581<br>9519  | NT                  | 1/457                                 | NT                        | NFE: 0.0002           | Predicted to be<br>benign by PolyPhen-<br>2/SIFT                                       |
|                         |                                                                                                                                      |                     |                                                                                                              | 17  | 7577088           | c.850A>T     | p.Thr284Ser    | MS    | s14434<br>0710  | NT                  | 1/457                                 | NT                        | Absent                | Predicted to be<br>possibly damaging by<br>PolyPhen-2, benign<br>by SIFT               |
|                         |                                                                                                                                      |                     |                                                                                                              | 17  | 7577091           | c.847C>T     | p.Arg283Cys    | MS    | rs1496<br>33775 | NT                  | 1/457                                 | NT                        | NFE: 0.0002           | Predicted to be<br>benign by PolyPhen-<br>2, possibly damaging<br>by SIFT              |
|                         |                                                                                                                                      |                     |                                                                                                              | 17  | 7577577           | c.704A>G     | p.Asn235Ser    | MS    | rs1443<br>40710 | NT                  | 1/457                                 | NT                        | NFE: 0.0003           | Predicted to be<br>benign by PolyPhen-<br>2/SIFT                                       |
|                         |                                                                                                                                      |                     |                                                                                                              | 17  | 7578475           | c.455C>T     | p.Pro152Leu    | MS    | rs5877<br>82705 | NT                  | 1/457                                 | NT                        | NFE: 4.50E-5          | Predicted to be<br>damaging by<br>PolyPhen-2/SIFT                                      |
| <i>BUB1</i>             | WES 2/23 Han<br>Chinese ≤40;<br>WES 0/10 Dutch<br>non-polyposis<br>MSS ≤40; TS<br>0/174 non-<br>polyposis MSS<br>Dutch/German<br>CRC | NT                  | Disruption of <i>BUB1</i> exon 1<br>in HCT- 116 (MSI human<br>CRC) caused chromosomal<br>segregation defects | 2   | 111398721         | c.2844delC   | p.Gln949Argfs  | FS    |                 | NT                  | 1/23<br>Chinese;<br>0/184<br>European | 0/700                     | Absent                |                                                                                        |
|                         |                                                                                                                                      |                     |                                                                                                              | 2   | 111431923         | c.46C>T      | p.Gln16Ter     | SG    |                 | No                  | 1/23<br>Chinese;<br>0/184<br>European | 0/700                     | Absent                | Carries MLH1 splice<br>donor mutation<br>which segregates<br>with colorectal<br>tumors |

| Gene          | CRC Gene Burden                                                                                                         | Control Gene Burden | Gene Functional Data                                                                                                                                                      | Chr | Position (GRCh37) | c.DNA Change | Protein Change | Class | dbSNP       | Segregation | Variant Case Frequency       | Variant Control Frequency | ExAC Allele Frequency       | Other Information                                                |
|---------------|-------------------------------------------------------------------------------------------------------------------------|---------------------|---------------------------------------------------------------------------------------------------------------------------------------------------------------------------|-----|-------------------|--------------|----------------|-------|-------------|-------------|------------------------------|---------------------------|-----------------------------|------------------------------------------------------------------|
| <i>BUB3</i>   | WES 0/23 Han Chinese $\leq$ 40; WES 1/10 Dutch non-polyposis MSS $\leq$ 40; TS 2/174 non-polyposis MSS Dutch/German CRC | NT                  |                                                                                                                                                                           | 10  | 124914496         | c.63G>C      | p.Lys21Asn     | MS    |             | NT          | 0/23 Chinese; 1/184 European | 0/1154                    |                             | Predicted to be damaging by PolyPhen-2/SIFT/HOPE                 |
|               |                                                                                                                         |                     |                                                                                                                                                                           | 10  | 124919951         | c.446G>A     | Arg149Gln      | MS    | rs371545161 | NT          | 0/23 Chinese; 1/184 European | 0/1154                    | NFE: 7.52E-5<br>EAS: Absent | Predicted to be damaging by HOPE, benign by PolyPhen-2/SIFT/HOPE |
|               |                                                                                                                         |                     |                                                                                                                                                                           | 10  | 124922163         | c.790T>C     | p.Phe264Leu    | MS    |             | NT          | 0/23 Chinese; 1/184 European | 0/1154                    | Absent                      | Predicted to be damaging by PolyPhen-2/SIFT/HOPE                 |
| <i>LRP6</i>   | WES 3/55 Dutch non-polyposis MSS AOD $\leq$ 45; TS 0/174 non-polyposis MSS Dutch/German CRC                             | 18/2,329            | In Chinese Hamster Ovary cells: no effect on LRP6 protein expression or localization; overexpression of p.Asn789Ser and p.Thr867Ala induced increased WNT signaling vs WT | 12  | 12311955          | c.2599A>G    | p.Thr867Ala    | MS    | rs141458215 | NT          | WES: 1/55; TS: 0/174         | 3/2329                    | NFE: 0.0002                 | Predicted to be damaging by PhyloP                               |
|               |                                                                                                                         |                     |                                                                                                                                                                           | 12  | 12312812          | c.2366A>G    | p.Asn789Ser    | MS    |             | NT          | WES: 1/55; TS: 0/174         | 0/2329                    | Absent                      | Predicted to be damaging by PhyloP                               |
|               |                                                                                                                         |                     |                                                                                                                                                                           | 12  | 12339985          | c.716G>T     | p.Trp239Leu    | MS    |             | NT          | WES: 1/55; TS: 0/174         | 0/2329                    | Absent                      | Predicted to be damaging by PhyloP                               |
| <i>PTPN12</i> | WES 3/55 Dutch non-polyposis MSS $\leq$ 45; TS 1/174 non-polyposis MSS Dutch/German CRC                                 | 11/2,329            |                                                                                                                                                                           | 7   | 77212900          | c.314C>T     | p.Ala105Val    | MS    |             | NT          | WES: 0/55; TS: 1/174         | 0/2329                    | Absent                      | Predicted to be damaging by PhyloP                               |
|               |                                                                                                                         |                     |                                                                                                                                                                           | 7   | 77256561          | c.1565G>T    | p.Arg522Met    | MS    | rs537562368 | NT          | WES: 1/55; TS: 0/174         | 2/2329                    | NFE: 1.50E-5                | Predicted to be damaging by PhyloP                               |
|               |                                                                                                                         |                     |                                                                                                                                                                           | 7   | 77261719          | c.2051C>T    | p.Ser684Leu    | MS    | rs201001953 | NT          | WES: 2/55; TS: 0/174         | 3/2329                    | NFE: 0.0012                 | Predicted to be damaging by PhyloP                               |

**Supplementary Table 2: Gene Burden analysis.** Number of WES cases (n=863) and controls (n=1,604) with rare mutations in genes suggested to increase CRC risk. We considered three sets of variants: Class-1, disruptive mutations -stop-gain, frameshift; Class-2, predicted damaging -disruptive plus missense predicted to be damaging by CONDEL and splice site acceptor/donors; Class-3, all coding non-synonymous variants. Tables show -A all cases - n=863 and controls -n=1,604 with very rare -MAF<0.1% mutations; -B Amsterdam-II positive cases -n=159 and controls with rare -MAF<1% mutations; -C Amsterdam-II positive cases and controls with very rare -MAF<0.1% mutations. For each gene and variant class, numbers of cases and controls were compared and *P*-values calculated using Fishers exact test.

**A**

| Gene              | Class-1 |          |                            | Class-2 |          |                            | Class-3         |                 |                            |
|-------------------|---------|----------|----------------------------|---------|----------|----------------------------|-----------------|-----------------|----------------------------|
|                   | Cases   | Controls | <i>P</i> <sub>Fisher</sub> | Cases   | Controls | <i>P</i> <sub>Fisher</sub> | Cases           | Controls        | <i>P</i> <sub>Fisher</sub> |
| <i>BUB1</i>       | 0       | 4        | 0.31                       | 1       | 8        | 0.17                       | 5               | 16              | 0.36                       |
| <i>BUB3</i>       | 0       | 2        | 0.55                       | 0       | 4        | 0.31                       | 1               | 5               | 0.67                       |
| <i>FAN1</i>       | 0       | 2        | 0.55                       | 3       | 5        | 1.00                       | 7               | 10 <sup>#</sup> | 0.62                       |
| <i>FANCM</i>      | 1       | 0        | 0.35                       | 7       | 8        | 0.42                       | 14 <sup>§</sup> | 21              | 0.59                       |
| <i>LRP6 -BPD*</i> | 0       | 0        | -                          | 3 -1    | 9 -6     | 0.56                       | 8 -2            | 20 -11          | 0.55                       |
| <i>PTPN12</i>     | 0       | 1        | 1.00                       | 3       | 3        | 0.43                       | 8               | 7               | 0.17                       |
| <i>RPS20</i>      | 1       | 0        | 0.35                       | 2       | 0        | 0.12                       | 2               | 0               | 0.12                       |
| <i>TP53</i>       | 1       | 0        | 0.35                       | 1       | 1        | 1.00                       | 1               | 3               | 1.00                       |

\*Number of variants within  $\beta$ -Propellor domain

# Total number of variants in controls = 11; 1 sample has 2 *FAN1* missense

§ Total number of variants in cases = 15; 1 sample has 2 *FANCM* missense

**B**

| Gene              | Class-1 |          |                            | Class-2 |         |                            | Class-3        |                 |                            |
|-------------------|---------|----------|----------------------------|---------|---------|----------------------------|----------------|-----------------|----------------------------|
|                   | Cases   | Controls | <i>P</i> <sub>Fisher</sub> | Case    | Control | <i>P</i> <sub>Fisher</sub> | Case           | Control         | <i>P</i> <sub>Fisher</sub> |
| <i>BUB1</i>       | 0       | 4        | 1.00                       | 1       | 8       | 0.58                       | 4              | 30              | 0.54                       |
| <i>BUB3</i>       | 0       | 2        | 1.00                       | 0       | 4       | 1.00                       | 0              | 5               | 1.00                       |
| <i>FAN1</i>       | 0       | 2        | 1.00                       | 2       | 17      | 0.69                       | 6              | 45              | 0.46                       |
| <i>FANCM</i>      | 0       | 1        | 1.00                       | 1       | 33      | 0.36                       | 7 <sup>§</sup> | 67 <sup>§</sup> | 0.84                       |
| <i>LRP6 -BPD*</i> | 0       | 0        | -                          | 1 -1    | 17 -13  | 1.00                       | 2 -2           | 37 -21          | 0.57                       |
| <i>PTPN12</i>     | 0       | 1        | 1.00                       | 1       | 5       | 0.44                       | 3              | 9               | 0.09                       |
| <i>RPS20</i>      | 0       | 0        | -                          | 1       | 0       | 0.09                       | 1              | 0               | 0.09                       |
| <i>TP53</i>       | 0       | 0        | -                          | 0       | 1       | 1.00                       | 0              | 4               | 1.00                       |

\*Number of variants within  $\beta$ -Propellor domain

§ Total number of variants in cases = 8 in controls = 69; 3 samples have 2 *FANCM* missense

C

| Gene              | Class-1 |          |                     | Class-2 |          |                     | Class-3        |          |                     |
|-------------------|---------|----------|---------------------|---------|----------|---------------------|----------------|----------|---------------------|
|                   | Cases   | Controls | $P_{\text{Fisher}}$ | Cases   | Controls | $P_{\text{Fisher}}$ | Cases          | Controls | $P_{\text{Fisher}}$ |
| <i>BUB1</i>       | 0       | 4        | 1.00                | 1       | 8        | 0.58                | 1              | 16       | 1.00                |
| <i>BUB3</i>       | 0       | 2        | 1.00                | 0       | 4        | 1.00                | 0              | 5        | 1.00                |
| <i>FAN1</i>       | 0       | 2        | 1.00                | 0       | 5        | 1.00                | 2              | 10       | 0.30                |
| <i>FANCM</i>      | 0       | 0        | -                   | 0       | 8        | 1.00                | 2 <sup>§</sup> | 21       | 1.00                |
| <i>LRP6 -BPD*</i> | 0       | 0        | -                   | 0       | 9-6      | 1.00                | 0              | 20-11    | 0.25                |
| <i>PTPN12</i>     | 0       | 1        | 1.00                | 0       | 3        | 1.00                | 1              | 7        | 0.53                |
| <i>RPS20</i>      | 0       | 0        | -                   | 1       | 0        | 0.09                | 1              | 0        | 0.09                |
| <i>TP53</i>       | 0       | 0        | -                   | 0       | 1        | 1.00                | 0              | 3        | 1.00                |

\*Number of variants within  $\beta$ -Propellor domain

§ Total number of variants in cases = 3; 1 sample has 2 *FANCM* missense



| Gene   | Chr | Position (GRCh37) | Ref | ALT | CONSEQUENCE      | Class | cDNA Change | Protein Change | Control_MAF | Case_MAF | ALT_Control | ALT_Cases | ALT_Ams | ExAC_Freq | ExAC_NF1000G_ALL | 1000G_EUR | Condel             | CADD_PHR           | PHRED_SIFT | score_SIFT | pred_polyphen2_HDIV | polyphen2_HDIV_pred | pubsNP      | COSMIC_ID   | COSMIC_DIS | ClinVar_Sig | ClinVar_DIS                                                                     |  |  |
|--------|-----|-------------------|-----|-----|------------------|-------|-------------|----------------|-------------|----------|-------------|-----------|---------|-----------|------------------|-----------|--------------------|--------------------|------------|------------|---------------------|---------------------|-------------|-------------|------------|-------------|---------------------------------------------------------------------------------|--|--|
| TP53   | 17  | 7573948           | C   | G   | missense_variant | 3     | c.1079G>C   | p.Gly360Ala    | 0.0004      | 0        | 2           | 0         | 0       | 0.0003    | 0.0001           | 0.0002    | 0.001              | neutral(0.002)     | 0.014      | 0.4        | T                   | 0                   | 0           | rs35993958  |            | unknown     | Hereditary_cancer-predisposing_syndrome;Hereditary_cancer-predisposing_syndrome |  |  |
| TP53   | 17  | 7573964           | C   | G   | missense_variant | 3     | c.1063G>A   | p.Ala355Thr    | 0.0004      | 0        | 1           | 0         | 0       |           |                  |           | neutral(0.064)     | 13.36              | 0.04       | D          | 0.003               | 0                   |             |             |            |             |                                                                                 |  |  |
| TP53   | 17  | 7574858           | C   | A   | stop_gained      | 1     | c.202G>T    | p.Glu68Ter     | 0           | 0.0005   | 0           | 1         | 0       |           |                  |           | deleterious(0.765) | 31                 | 0          | D          | 0                   | 1                   |             |             |            |             |                                                                                 |  |  |
| LRP6   | 12  | 12274102          | G   | C   | missense_variant | 3     | c.4800C>G   | p.His1600Gln   | 0           | 0.0005   | 0           | 1         | 0       | 1.67E-05  |                  |           | neutral(0.034)     | 13.25              | 0.03       | D          | 0.997               | 0                   | rs138902458 |             |            |             |                                                                                 |  |  |
| LRP6   | 12  | 12277562          | C   | T   | missense_variant | 2     | c.4484G>A   | p.Arg1495Gln   | 0.0003      | 0        | 1           | 0         | 0       | 9.06E-05  | 0.0001           |           | deleterious(0.682) | 36                 | 0.17       | T          | 0.999               | 0                   | rs149558764 |             |            |             |                                                                                 |  |  |
| LRP6   | 12  | 12278243          | G   | A   | missense_variant | 3     | c.4436C>T   | p.Trp1479Ile   | 0.0016      | 0        | 5           | 0         | 0       | 0.0002    | 0.0003           |           | neutral(0.029)     | 16.56              | 0.25       | T          | 0.403               | 0                   | rs144175121 |             |            |             |                                                                                 |  |  |
| LRP6   | 12  | 12278303          | G   | A   | missense_variant | 2     | c.4370G>T   | p.Gly1457Val   | 0.0003      | 0        | 1           | 0         | 0       | 4.13E-04  | 7.51E-05         |           | neutral(0.482)     | 22.9               | 0.15       | T          | 0.999               | 0                   | rs374072779 |             |            |             |                                                                                 |  |  |
| LRP6   | 12  | 12279642          | A   | G   | missense_variant | 3     | c.4295C>T   | p.Leu1432Ser   | 0.0007      | 0        | 2           | 0         | 0       | 1.65E-05  | 3.00E-05         |           | neutral(0.013)     | 13.62              | 0.78       | T          | 0.557               | 0                   |             |             |            |             |                                                                                 |  |  |
| LRP6   | 12  | 12279723          | T   | A   | missense_variant | 3     | c.4214A>T   | p.Asp1405Val   | 0.0006      | 0.0005   | 2           | 1         | 3       | 3.30E-05  | 5.99E-05         |           | neutral(0.034)     | 14.54              | 0.05       | D          | 0.343               | 0                   |             |             |            |             |                                                                                 |  |  |
| LRP6   | 12  | 12279793          | C   | A   | missense_variant | 3     | c.4144G>T   | p.Val1382Phe   | 0.0003      | 0.0017   | 1           | 3         | 0       | 0.0009    | 0.0011           | 0.0012    | 0.001              | neutral(0.044)     | 15         | 0.21       | T                   | 0.04                | 0           | rs139480047 |            |             |                                                                                 |  |  |
| LRP6   | 12  | 12283731          | G   | A   | missense_variant | 2     | c.4067A>C   | p.Asp1356Ala   | 0.0003      | 0        | 1           | 0         | 0       | 1.66E-05  | 3.02E-05         |           | deleterious(0.945) | 23.1               | 0          | D          | 0.998               | 0                   | rs376168250 |             |            |             |                                                                                 |  |  |
| LRP6   | 12  | 12283783          | T   | G   | missense_variant | 3     | c.4015A>C   | p.Ile1339Leu   | 0.0003      | 0        | 1           | 0         | 0       | 0.0003    | 0                |           | neutral(0.279)     | 15.88              | 0.03       | D          | 0.05                | 0                   |             |             |            |             |                                                                                 |  |  |
| LRP6   | 12  | 12283804          | A   | G   | missense_variant | 2     | c.3994C>T   | p.Arg1332Cys   | 0           | 0.0005   | 0           | 1         | 0       | 6.62E-05  | 1.51E-05         |           | deleterious(0.634) | 22.4               | 0.02       | D          | 0.992               | 0                   |             |             |            |             |                                                                                 |  |  |
| LRP6   | 12  | 12284815          | C   | T   | missense_variant | 3     | c.3910G>A   | p.Ala1304Thr   | 0.0003      | 0        | 1           | 0         | 0       | 5.77E-05  | 5.99E-05         |           | neutral(0.017)     | 10.9               | 0.58       | T          | 0.053               | 0                   | rs376223132 |             |            |             |                                                                                 |  |  |
| LRP6   | 12  | 12284821          | C   | T   | missense_variant | 3     | c.3904G>A   | p.Asp1302Asn   | 0           | 0.0006   | 0           | 1         | 0       | 0         | 0                |           | neutral(0.461)     | 3                  | 0.32       | T          | 0.799               | 0                   |             |             |            |             |                                                                                 |  |  |
| LRP6   | 12  | 12284914          | C   | T   | missense_variant | 2     | c.3811G>A   | p.Asp1271Asn   | 0           | 0.0005   | 0           | 1         | 0       | 0         | 0                |           | deleterious(0.865) | 35                 | 0.09       | T          | 1                   | 0                   |             |             |            |             |                                                                                 |  |  |
| LRP6   | 12  | 12284926          | G   | C   | missense_variant | 2     | c.3616G>C   | p.Pro1260Ala   | 0.0003      | 0        | 1           | 0         | 0       | 4.12E-05  | 6.00E-05         |           | neutral(0.476)     | 25.1               | 0.08       | T          | 0.996               | 0                   | rs373983730 |             |            |             |                                                                                 |  |  |
| LRP6   | 12  | 12291339          | G   | C   | missense_variant | 3     | c.3527A>C   | p.Glu1176Ala   | 0.0003      | 0.0011   | 1           | 2         | 0       | 0.0001    | 0.0002           |           | neutral(0.005)     | 14.56              | 0.58       | T          | 0.005               | 0                   | rs145672862 |             |            |             |                                                                                 |  |  |
| LRP6   | 12  | 12301951          | T   | A   | missense_variant | 2     | c.3131A>T   | p.Asp1044Val   | 0.0003      | 0        | 1           | 0         | 0       | 8.24E-06  | 1.50E-05         |           | deleterious(0.543) | 20.9               | 0.03       | D          | 0.838               | 0                   |             |             |            |             |                                                                                 |  |  |
| LRP6   | 12  | 12302006          | G   | A   | missense_variant | 2     | c.3076C>T   | p.Arg1026Cys   | 0.0003      | 0        | 4           | 0         | 0       | 0.0001    | 0.0001           | 0.0008    |                    | deleterious(0.869) | 23.3       | 0          | D                   | 1                   | 0           | rs140679529 | COSM180991 | 1           | (endometrium);1(large                                                           |  |  |
| LRP6   | 12  | 12303837          | C   | G   | missense_variant | 3     | c.2927A>G   | p.Asp976Gly    | 0.0003      | 0        | 1           | 0         | 0       | 1.65E-05  | 3.00E-05         |           | neutral(0.050)     | 17.25              | 0.38       | T          | 0.396               | 0                   | rs368801975 |             |            |             |                                                                                 |  |  |
| LRP6   | 12  | 12303861          | C   | T   | missense_variant | 3     | c.2903G>C   | p.Arg968Gln    | 0.0003      | 0        | 1           | 0         | 0       | 8.24E-06  | 0                |           | neutral(0.313)     | 36                 | 0.63       | T          | 0.999               | 0                   |             |             |            |             |                                                                                 |  |  |
| LRP6   | 12  | 12311913          | C   | T   | missense_variant | 2     | c.2641G>C   | p.Val881Ile    | 0.0003      | 0        | 0           | 0         | 0       | 8.24E-06  | 1.50E-05         |           | deleterious(0.790) | 14.16              | 0.12       | D          | 0.999               | 0                   |             |             |            |             |                                                                                 |  |  |
| LRP6   | 12  | 12311955          | T   | A   | missense_variant | 2     | c.2599A>G   | p.Trp867Ala    | 0.0003      | 0.0006   | 1           | 1         | 0       | 0.0001    | 0.0002           |           | neutral(0.471)     | 18.01              | 0.37       | T          | 0.857               | 0                   | rs141458215 |             |            |             |                                                                                 |  |  |
| LRP6   | 12  | 12315203          | C   | T   | missense_variant | 2     | c.2203G>A   | p.Asp735Asn    | 0.0003      | 0        | 1           | 0         | 0       | 0.0001    | 0.0002           | 0.0002    | 0.001              | deleterious(0.756) | 36         | 0.51       | T                   | 1                   | 0           | rs149258721 |            |             |                                                                                 |  |  |
| LRP6   | 12  | 12315310          | A   | C   | missense_variant | 2     | c.2096T>G   | p.Val699Gly    | 0.0003      | 0        | 1           | 0         | 0       | 0         | 0                |           | deleterious(0.877) | 25.4               | 0          | D          | 1                   | 0                   |             |             |            |             |                                                                                 |  |  |
| LRP6   | 12  | 12317322          | G   | C   | missense_variant | 2     | c.1937C>G   | p.Ser646Cys    | 0.0003      | 0        | 1           | 0         | 0       | 0         | 0                |           | deleterious(0.801) | 19.86              | 0.04       | D          | 1                   | 0                   |             |             |            |             |                                                                                 |  |  |
| LRP6   | 12  | 12317387          | C   | G   | missense_variant | 3     | c.1872G>C   | p.Met622Ile    | 0           | 0.0005   | 0           | 1         | 0       | 0         | 0                |           | neutral(0.261)     | 14.16              | 0.17       | T          | 0.858               | 0                   |             |             |            |             |                                                                                 |  |  |
| LRP6   | 12  | 12318150          | C   | T   | missense_variant | 2     | c.1625G>A   | p.Gly542Asp    | 0           | 0.0005   | 0           | 1         | 0       | 8.24E-05  | 0.0001           |           | neutral(0.777)     | 26.1               | 0.3        | T          | 0.999               | 0                   | rs139800650 |             |            |             |                                                                                 |  |  |
| LRP6   | 12  | 12332842          | C   | T   | missense_variant | 3     | c.1447G>A   | p.Val483Ile    | 0.0003      | 0.0005   | 1           | 1         | 0       | 0.0162    | 0.0002           | 0.053     | 0.001              | neutral(0.245)     | 17.25      | 0.36       | T                   | 0.013               | 0           | rs7975614   |            |             |                                                                                 |  |  |
| LRP6   | 12  | 12334037          | T   | C   | missense_variant | 3     | c.1313A>G   | p.Leu438Arg    | 0           | 0.0006   | 0           | 1         | 0       | 0         | 0                |           | neutral(0.043)     | 13.7               | 0.34       | T          | 0.091               | 0                   |             |             |            |             |                                                                                 |  |  |
| LRP6   | 12  | 12334052          | T   | C   | missense_variant | 2     | c.1298A>G   | p.Asn435Ser    | 0           | 0.0005   | 0           | 1         | 0       | 2.47E-05  | 4.50E-05         |           | deleterious(0.634) | 19.52              | 0.07       | T          | 0.982               | 0                   | rs397515473 |             |            |             |                                                                                 |  |  |
| LRP6   | 12  | 12334228          | T   | C   | missense_variant | 2     | c.1224G>C   | p.Ile409Gln    | 0.0003      | 0        | 1           | 0         | 0       | 0         | 0                |           | neutral(0.263)     | 14.16              | 0.14       | T          | 0.996               | 0                   |             |             |            |             |                                                                                 |  |  |
| LRP6   | 12  | 12334248          | C   | T   | missense_variant | 2     | c.1102G>A   | p.Asp368Asn    | 0.0003      | 0        | 1           | 0         | 0       | 8.24E-06  | 1.50E-05         |           | deleterious(0.798) | 27.6               | 0.01       | D          | 0.996               | 0                   |             |             |            |             |                                                                                 |  |  |
| LRP6   | 12  | 12334271          | C   | T   | missense_variant | 2     | c.1079G>A   | p.Arg360His    | 0.0003      | 0.0011   | 1           | 1         | 0       | 0.0001    | 0.0002           |           | deleterious(0.667) | 33                 | 0.13       | T          | 1                   | 0                   | rs141212743 |             |            |             |                                                                                 |  |  |
| LRP6   | 12  | 12339925          | C   | T   | missense_variant | 3     | c.776G>A    | p.Arg259His    | 0.0003      | 0        | 1           | 0         | 0       | 4.12E-05  | 3.00E-05         |           | neutral(0.383)     | 18.13              | 0.13       | T          | 0.983               | 0                   |             |             |            |             |                                                                                 |  |  |
| LRP6   | 12  | 12397266          | A   | T   | missense_variant | 3     | c.3797A>T   | p.Ser127Thr    | 0.0003      | 0        | 1           | 0         | 0       | 0.0002    | 1.50E-05         | 0.006     |                    | neutral(0.000)     | 24.47      | 0.73       | T                   | 0                   | 0           | rs17848270  |            |             |                                                                                 |  |  |
| LRP6   | 12  | 12397530          | C   | T   | missense_variant | 3     | c.1155G>A   | p.Gly395Arg    | 0.0003      | 0        | 1           | 0         | 0       | 8.24E-05  | 0.0001           |           | neutral(0.023)     | 10.42              | 0.71       | T          | 0.999               | 0                   | rs147654774 |             |            |             |                                                                                 |  |  |
| LRP6   | 12  | 12397550          | C   | T   | missense_variant | 2     | c.950G>A    | p.Arg320Gln    | 0.0003      | 0        | 1           | 0         | 0       | 0         | 0                |           | deleterious(0.740) | 25.2               | 0.07       | T          | 0.999               | 0                   |             |             |            |             |                                                                                 |  |  |
| FAM115 | 15  | 31196876          | G   | A   | missense_variant | 3     | c.106A>G    | p.Glu4Lys      | 0           | 0.0005   | 0           | 1         | 0       | 8.88E-06  | 1.53E-05         |           | neutral(0.064)     | 18.35              | 0.05       | D          | 0.775               | 0                   | rs369398471 |             |            |             |                                                                                 |  |  |
| FAM115 | 15  | 31196946          | C   | A   | missense_variant | 3     | c.80C>A     | p.Ser277Iyr    | 0.0003      | 0        | 1           | 0         | 0       | 0         | 0                |           | neutral(0.406)     | 14.26              | 0.05       | D          | 0.01                | 0                   |             |             |            |             |                                                                                 |  |  |
| FAM115 | 15  | 31196961          | C   | T   | missense_variant | 3     | c.95C>T     | p.Ser32Leu     | 0.0006      | 0        | 2           | 0         | 0       | 3.30E-05  | 6.00E-05         |           | neutral(0.256)     | 17.74              | 0.01       | D          | 0.76                | 0                   |             |             |            |             |                                                                                 |  |  |
| FAM115 | 15  | 31197015          | T   | G   | missense_variant | 2     | c.1491G>C   | p.Met50Arg     | 0.0031      | 0.0061   | 10          | 10        | 0       | 0.002     | 0.0026           | 0.0018    | 0.006              | deleterious(0.757) | 22.8       | 0.01       | D                   | 0.999               | 0           | rs148404807 |            |             |                                                                                 |  |  |
| FAM115 | 15  | 31197265          | G   | A   | missense_variant | 3     | c.400G>A    | p.Val134Met    | 0.0006      | 0        | 1           | 0         | 0       | 4.13E-05  | 7.51E-05         | 0.0002    | 0.001              | neutral(0.046)     | 9.959      | 0.27       | T                   | 0.471               | 0           | rs144046046 |            |             |                                                                                 |  |  |
| FAM115 | 15  | 31197291          | C   | T   | missense_variant | 3     | c.425T>C    | p.Leu142Pro    | 0           | 0.0005   | 0           | 1         | 0       | 0         | 0                |           | neutral(0.035)     | 10.34              | 0.26       | T          | 0.465               | 0                   |             |             |            |             |                                                                                 |  |  |
| FAM115 | 15  | 31197300          | G   | A   | missense_variant | 3     | c.434G>A    | p.Arg145His    | 0.0019      | 0.002    | 6           | 3         | 0       | 0.0012    | 0.0018           | 0.0002    | 0.001              | neutral(0.027)     | 10.99      | 0.31       | T                   | 0.025               | 0           | rs146408181 |            |             |                                                                                 |  |  |
| FAM115 | 15  | 31197584          | G   | A   | missense_variant | 3     | c.718G>A    | p.Glu240Val    | 0.0047      | 0.0065   | 15          | 9         | 0       | 0.0035</  |                  |           |                    |                    |            |            |                     |                     |             |             |            |             |                                                                                 |  |  |



Gene  
Chr  
Position (GRCh37)  
Ref  
Alt  
CONSEQUENCE  
Class  
c.DNA Change  
Protein Change  
Control\_MAF  
Case\_MAF

ALT\_Control

ALT\_Cases

ALT\_Ams  
ExAC\_Freq  
ExAC\_NFE  
1000G\_ALL  
1000G\_EUR  
Condel  
CADD\_PHRED  
SIFT\_score  
SIFT\_pred  
Polyphen2\_HDIV\_score  
Polyphen2\_HDIV\_pred  
dbSNP  
COSMIC\_ID  
COSMIC\_DIS  
ClinVar\_SIG  
ClinVar\_DIS

**Supplementary Figure 1: Forest plot of allelic odds ratio associated with *FANCM* p.Arg1931Ter (rs144567652) genotype and CRC.** Studies [SMITH: original publication (2,207 cases, 2,176 controls)<sup>1</sup>; WES: whole-exome sequencing analyzed in this manuscript (863 cases, 1,604 controls); ENG: English Illumina Exome-BeadChip replication series (3,537 cases, 4,811 controls); SCOT: Scottish Illumina Exome-BeadChip replication series (2,015 cases, 1,981 controls)] were weighted according to the inverse of the variance of the log of the odds ratio (OR) calculated by unconditional logistic regression. Meta-analysis under a fixed-effects model was conducted using standard methods. Cochran's *Q* statistic to test for heterogeneity and the *I*<sup>2</sup> statistic to quantify the proportion of the total variation due to heterogeneity were calculated. Horizontal lines indicate 95% confidence intervals (CIs). Boxes indicate OR point estimate; its area is proportional to the weight of the study. Diamond (and broken line) indicates overall summary estimate, with CI given by its width. Unbroken vertical line indicates null value (OR=1.0).

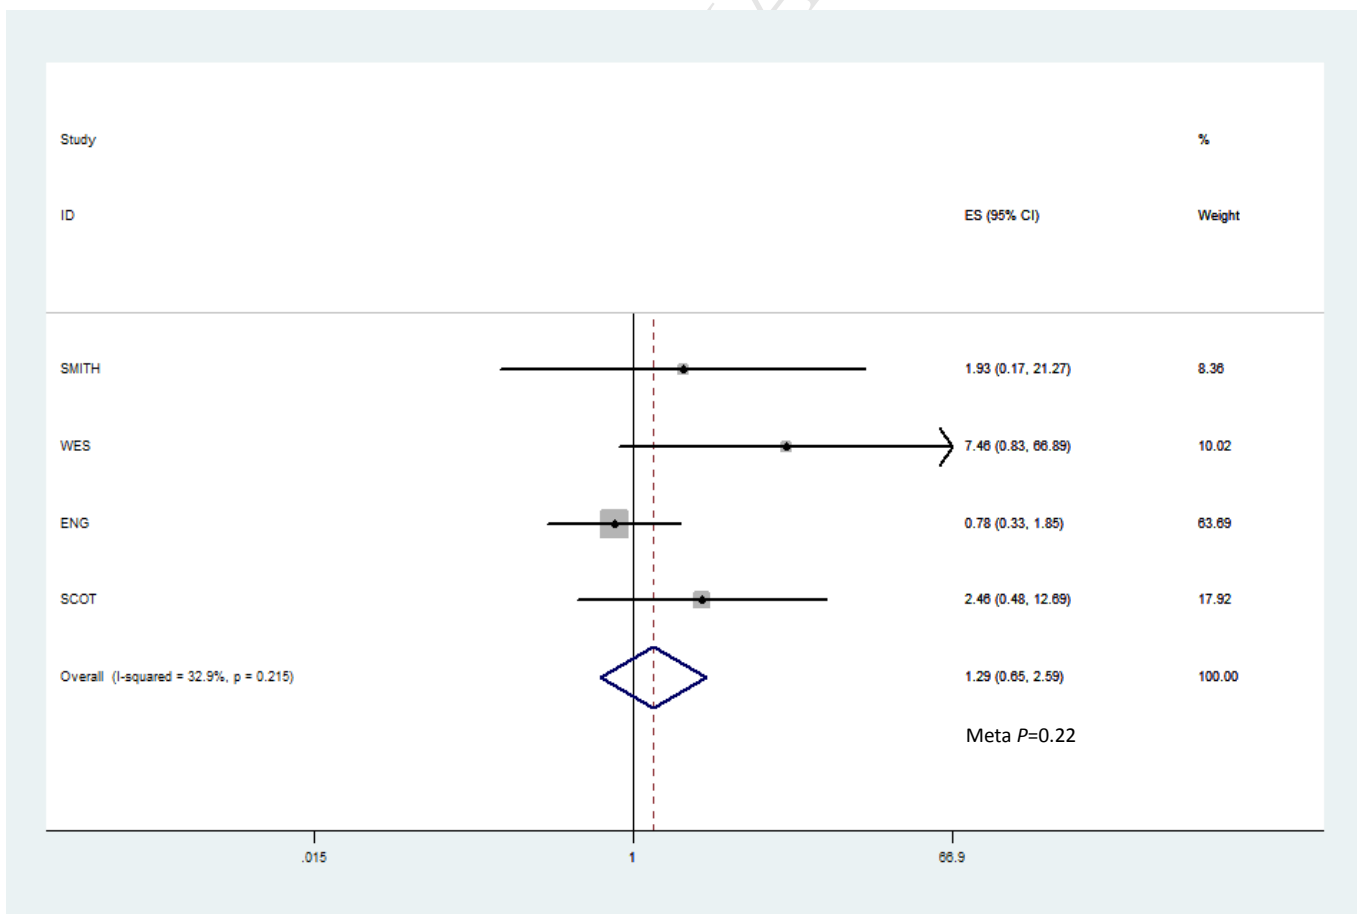

Supplement: NIHMS76506-supplement-Supplementary_Information.pdf [file NIHMS76506-supplement-Supplementary_Information.pdf]
